# Supplementary material for: mRNA Vaccine Designing Using Chikungunya Virus E Glycoprotein through Immunoinformatics-Guided Approaches
Source: MDPI journal article supplement (doi:10.3390/vaccines10091476), 2022-09-06
Supplement: s1 [file s1]

**Supplementary Table S3.** Population Coverage analysis by IEDB resource.

| Sr. No. | T-cell epitopes | Interacting MHC alleles | Highly interacting MHC allele list                              | Population Coverage (South Asia) |
|---------|-----------------|-------------------------|-----------------------------------------------------------------|----------------------------------|
| 1       | KYDLECAQI       | MHC-I                   | HLA-C*04:01, HLA-A*24:02, HLA-A*23:01, HLA-C*14:02, HLA-C*08:02 | 39.06%                           |
| 2       | SGRPIFDNKGRVVAI | MHC-II                  | HLA-DRB1*13:02                                                  | 3.59%                            |
| 3       | ERMCMKIENDCIFEV | MHC-II                  | HLA-DRB1*03:01                                                  | 16.37%                           |
| 4       | ITCEYKTVIPSPYVK | MHC-II                  | HLA-DRB1*04:05, HLA-DRB1*09:01                                  | 3.20%                            |
| 5       | VYKGDVYNMDYPPFG | MHC-II                  | HLA-DRB1*04:01                                                  | 2.76%                            |
| 6       | YACLVGDKVMKPAHV | MHC-II                  | HLA-DRB1*03:01, HLA-DRB1*09:01                                  | 18.38%                           |
