# Supplementary material for: mRNA Vaccine Designing Using Chikungunya Virus E Glycoprotein through Immunoinformatics-Guided Approaches
Source: MDPI journal article supplement (doi:10.3390/vaccines10091476), 2022-09-06
Supplement: s1 [file s1]

**Supplementary Table S5.** Analysis of mRNA sequence by codon optimization tools

| Optimization tool | Average GC content (%) | CAI value |
|-------------------|------------------------|-----------|
| JCAT tool         | 66.51                  | 0.96      |
| ExpOptimizer tool | 50.13%                 | 0.81      |
